# Supplementary material for: Post-pandemic challenges in higher education: learning preferences, performance and dropout in a first-semester chemistry course
Source: Royal Society of Chemistry journal article supplement (doi:10.1039/d5rp00296f), 2025-11-19
Supplement: d5rp00296f1.pdf [file d5rp00296f1.pdf]

## Supplementary material

### Post-pandemic challenges in higher education: learning preferences, performance and dropout in a first-semester chemistry course

Nicolás Pérez, Lorena Martínez, Natalia Alvarez, Lucía Otero, Nicolás Veiga\*, Julia Torres\*

Área Química Inorgánica, DEC, Facultad de Química, Universidad de la República, General Flores 2124, Montevideo, Uruguay

\*corresponding authors: [nveiga@fq.edu.uy](mailto:nveiga@fq.edu.uy), [jtorres@fq.edu.uy](mailto:jtorres@fq.edu.uy)

## Supplementary tables

Table S1. Summary of assessment practices before, during, and after the COVID-19 pandemic.

| Period                    | Test Format               | Modality                     | Supervision                                           | Test Composition and Design                                                                                                                                                                      | Evaluation Criteria                                                                                             | Notes                                                                                                      |
|---------------------------|---------------------------|------------------------------|-------------------------------------------------------|--------------------------------------------------------------------------------------------------------------------------------------------------------------------------------------------------|-----------------------------------------------------------------------------------------------------------------|------------------------------------------------------------------------------------------------------------|
| Pre-pandemic (2017-2019)  | Two multiple-choice tests | In-person                    | On site by instructors                                | Multiple-choice questions (5 options, 1 correct). Questions drawn from a validated database covering theoretical and practical aspects with predefined proportions of difficulty and time demand | Final grade = % of correct answers – 20% (guessing correction). Course passed with ≥50% of total possible score | Standard assessment format: all students of a cohort take identical tests; no additional graded activities |
| Early pandemic (2020)     | Same as pre-pandemic      | One online and one in-person | On site or online in small Zoom groups by instructors | Same as pre-pandemic                                                                                                                                                                             | Same as pre-pandemic                                                                                            | First evaluation was conducted remotely                                                                    |
| Late pandemic (2021)      | Same as pre-pandemic      | Online                       | Online in small Zoom groups by instructors            | Same as pre-pandemic                                                                                                                                                                             | Same as pre-pandemic                                                                                            | Full evaluation was conducted remotely                                                                     |
| Post-pandemic (2022-2023) | Same as pre-pandemic      | Same as pre-pandemic         | Same as pre-pandemic                                  | Same as pre-pandemic                                                                                                                                                                             | Same as pre-pandemic                                                                                            | Return to standard assessment format                                                                       |

Table S2. Variables selected for this study and their descriptive parameters.<sup>a</sup>

| Group of variables              |          | Variable | Description                                       | n    | mean  | sd    | min  | max  | Detail                                              | Period      |
|---------------------------------|----------|----------|---------------------------------------------------|------|-------|-------|------|------|-----------------------------------------------------|-------------|
| General descriptors of students |          | GDR      | Gender                                            | 4511 | 0.32  | 0.47  | 0    | 1    | (Female=0; Male=1)                                  | 2017-2023   |
|                                 |          | Y        | Year of enrolment                                 | 4511 | ---   | ---   | 2017 | 2023 | ---                                                 | ---         |
|                                 |          | RP       | Repeating the course                              | 4511 | 0.23  | 0.42  | 0    | 1    | (NO=0; YES=1)                                       | 2017-2023   |
|                                 |          | ON       | Taking the flexible modality                      | 4511 | 0.08  | 0.27  | 0    | 1    | (NO=0; YES=1)                                       | 2017-2023   |
|                                 |          | G1       | Previous academic performance                     | 4277 | 34.55 | 23.67 | 0    | 100  | First evaluation in marks %                         | 2017-2023   |
|                                 |          | DR       | Dropout                                           | 4511 | 0.19  | 0.39  | 0    | 1    | Students taking only first evaluation (NO=0; YES=1) | 2017-2023   |
|                                 |          | GCI      | Final academic performance                        | 4511 | 29.06 | 22.98 | 0    | 100  | In-presence multiple-choice tests marks (%)         | 2017-2023   |
| Access / use / usefulness       | Theory   | T_U      | Zoom synchronous lectures use frequency           | 389  | 2.28  | 1.10  | 1    | 4    | Survey (Likert 1-4)                                 | 2022        |
|                                 |          | T_Uf     | Zoom synchronous lectures perceived usefulness    | 383  | 3.29  | 1.16  | 1    | 5    | Survey (Likert 1-5)                                 | 2022        |
|                                 |          | TV_A     | Access to recorded lectures                       | 2816 | 44.73 | 33.12 | 0    | 100  | YouTube access to videos                            | 2020 - 2023 |
|                                 |          | TV_U     | Lectures videos use frequency                     | 391  | 3.11  | 1.01  | 1    | 4    | Survey (Likert 5111-4)                              | 2022        |
|                                 |          | TV_Uf    | Lectures videos perceived usefulness              | 390  | 4.15  | 1.04  | 1    | 5    | Survey (Likert1-5)                                  | 2022        |
|                                 |          | AV_A     | Access to animated YouTube videos                 | 2816 | 17.13 | 25.20 | 0    | 100  | YouTube access to videos                            | 2020 - 2023 |
|                                 |          | AV_U     | Animated YouTube videos use frequency             | 390  | 1.92  | 0.95  | 1    | 4    | Survey (Likert1-4)                                  | 2022        |
|                                 |          | AV_Uf    | Animated YouTube videos perceived usefulness      | 387  | 3.14  | 1.08  | 1    | 5    | Survey (Likert1-5)                                  | 2022        |
|                                 |          | RM_A     | Access to recommended reading material            | 2816 | 40.57 | 34.34 | 0    | 100  | VLE registered access                               | 2020 - 2023 |
|                                 |          | RM_U     | Recommended reading material use frequency        | 391  | 3.04  | 0.96  | 1    | 4    | Survey (Likert1-4)                                  | 2022        |
|                                 |          | RM_Uf    | Recommended reading material perceived usefulness | 386  | 4.14  | 0.98  | 1    | 5    | Survey (Likert1-5)                                  | 2022        |
|                                 | Practice | PV_A     | Access to recorded practical classes              | 2816 | 29.99 | 30.67 | 0    | 100  | YouTube access to videos                            | 2020 - 2023 |
|                                 |          | PV_U     | Recorded practical classes use frequency          | 391  | 2.42  | 1.08  | 1    | 4    | Survey (Likert1-4)                                  | 2022        |
|                                 |          | PV_Uf    | Recorded practical classes perceived usefulness   | 386  | 3.85  | 1.05  | 1    | 5    | Survey (Likert1-5)                                  | 2022        |

|  |                              |       |                                                                  |      |      |      |   |   |                      |                      |
|--|------------------------------|-------|------------------------------------------------------------------|------|------|------|---|---|----------------------|----------------------|
|  |                              | CL_Uf | Solving clues perceived usefulness                               | 1041 | 4.02 | 0.89 | 1 | 5 | Survey (Likert1-5)   | 2017<br>2020<br>2022 |
|  |                              | FK_Uf | Feedback answers perceived usefulness                            | 1044 | 4.17 | 0.85 | 1 | 5 | Survey (Likert1-5)   | 2017<br>2020<br>2022 |
|  |                              | KW_Uf | Daily-life curiosities "know-what" sections perceived usefulness | 1056 | 3.43 | 0.95 | 1 | 5 | Survey (Likert1-5)   | 2017<br>2020<br>2022 |
|  |                              | KM_Uf | Higher-level "know-more" sections perceived usefulness           | 1029 | 3.42 | 0.95 | 1 | 5 | Survey (Likert1-5)   | 2017<br>2020<br>2022 |
|  |                              | Hy_Uf | History sections perceived usefulness                            | 1026 | 3.19 | 0.94 | 1 | 5 | Survey (Likert1-5)   | 2017<br>2020<br>2022 |
|  | Student-educator interaction | TS_U  | Time for student queries use frequency                           | 391  | 1.95 | 0.96 | 1 | 4 | Survey (Likert1-4)   | 2022                 |
|  |                              | TS_Uf | Time for student queries perceived usefulness                    | 386  | 3.38 | 0.98 | 1 | 5 | Survey (Likert1-5)   | 2022                 |
|  |                              | EF_A  | Access to electronic forum                                       | 2816 | 0.83 | 0.38 | 0 | 1 | (NO=0; YES=1)        | 2020 - 2023          |
|  |                              | EF_U  | Electronic forum use frequency                                   | 389  | 1.92 | 0.86 | 1 | 4 | Survey (Likert1-4)   | 2022                 |
|  |                              | EF_Uf | Electronic forum perceived usefulness                            | 386  | 3.32 | 0.95 | 1 | 5 | Survey (Likert1-5)   | 2022                 |
|  | Self-assessment              | M_U   | Mocks use frequency                                              | 389  | 0.92 | 0.27 | 0 | 1 | Survey (NO=0; YES=1) | 2022                 |
|  |                              | M_Uf  | Mocks perceived usefulness                                       | 389  | 4.52 | 0.81 | 1 | 5 | Survey (Likert1-5)   | 2022                 |

<sup>a</sup> n = sample size, sd = standard deviation, min = minimum value, max = maximum value.

Table S3. Temporal evolution of students' descriptors expressed as student percentages.<sup>a</sup>

| year                | n           | GDR = 1 (%) | DR = 1 (%)  | RP = 1 (%)  | ON = 1 (%) | GCI (average in marks %) | Percent of students above passing grade | Period        |
|---------------------|-------------|-------------|-------------|-------------|------------|--------------------------|-----------------------------------------|---------------|
| 2017                | 563         | 33.0        | 13.9        | 20.8        | 6.4        | 33.6                     | 21.5                                    | pre-pandemic  |
| 2018                | 560         | 33.9        | 14.8        | 20.0        | 4.6        | 33.3                     | 23.0                                    |               |
| 2019                | 572         | 33.2        | 14.2        | 18.5        | 5.6        | 28.9                     | 20.8                                    |               |
| 2020                | 718         | 31.9        | 34.1        | 25.9        | 10.5       | 22.8                     | 16.2                                    | pandemic      |
| 2021                | 739         | 31.1        | 20.2        | 26.1        | 6.8        | 30.2                     | 21.5                                    |               |
| 2022                | 637         | 30.0        | 13.5        | 27.3        | 9.4        | 28.6                     | 18.2                                    | post-pandemic |
| 2023                | 722         | 32.6        | 18.6        | 23.5        | 10.9       | 27.9                     | 17.3                                    |               |
| <b>Total sample</b> | <b>4511</b> | <b>32.2</b> | <b>19.0</b> | <b>23.5</b> | <b>7.9</b> | <b>29.1</b>              | <b>19.6</b>                             |               |

<sup>a</sup> GDR = 1 (male student), RP = 1 (student repeating the course), ON = 1 (students that chose online modality of the course), DR = 1 (students dropping out after the first test).

Table S4. Average percentage variation ( $\bar{x}$ ) and confidence intervals ( $CI$ ) for general descriptors of the students across different selected periods.

| Comparison                    | GDR = 1 (%) <sup>a</sup> |             | RP = 1 (%) <sup>a</sup> |                    | ON = 1 (%) <sup>a</sup> |                    | DR = 1 (%) <sup>a</sup> |                      | GCI (average; %) <sup>b</sup> |                      |
|-------------------------------|--------------------------|-------------|-------------------------|--------------------|-------------------------|--------------------|-------------------------|----------------------|-------------------------------|----------------------|
|                               | $\bar{x}$                | $CI$ 95%    | $\bar{x}$               | $CI$ 95%           | $\bar{x}$               | $CI$ 95%           | $\bar{x}$               | $CI$ 95%             | $\bar{x}$                     | $CI$ 95%             |
| 2020 to pre-pandemic          | -1.5                     | [-6.7, 3.7] | <b>6.1*</b>             | <b>[1.6, 10.7]</b> | <b>4.9*</b>             | <b>[2.1, 7.7]</b>  | <b>19.8*</b>            | <b>[15.4, 24.3]</b>  | <b>-9.1*</b>                  | <b>[-11.8, -6.4]</b> |
| 2021 to 2020                  | -0.8                     | [-6.9, 5.3] | 0.2                     | [-5.5, 6.0]        | <b>-3.7*</b>            | <b>[-7.3, 0.0]</b> | <b>-14.0*</b>           | <b>[-19.8, -8.1]</b> | <b>7.5*</b>                   | <b>[4.3, 10.6]</b>   |
| Post-pandemic to 2021         | 0.2                      | [-5.1, 5.5] | -0.8                    | [-5.8, 4.2]        | <b>3.5*</b>             | <b>[0.2, 6.7]</b>  | -4.0                    | [-8.3, 0.4]          | -2.0                          | [-4.6, 0.6]          |
| Post-pandemic to pre-pandemic | -2.0                     | [-6.3, 2.2] | <b>5.5*</b>             | <b>[1.8, 9.3]</b>  | <b>4.7*</b>             | <b>[2.3, 7.1]</b>  | 1.9                     | [-1.3, 5.2]          | <b>-3.6*</b>                  | <b>[-5.8, -1.6]</b>  |

\* Statistical significance at 95% level of confidence. <sup>a</sup> Two-sample Proportion z-test with Bonferroni correction per variable. <sup>b</sup> Games-Howell test.

Table S5. Average variation in the percentage of resources accessed ( $\bar{x}$ ) and their confidence intervals ( $CI$ ) across different selected periods.

| Comparison  | TV_A (%) <sup>a</sup> |                     | AV_A (%) <sup>a</sup> |                      | PV_A (%) <sup>a</sup> |                       | RM_A (%) <sup>a</sup> |                      | EF_A = 1 (%) <sup>b</sup> |                       |
|-------------|-----------------------|---------------------|-----------------------|----------------------|-----------------------|-----------------------|-----------------------|----------------------|---------------------------|-----------------------|
|             | $\bar{x}$             | $CI$ 95%            | $\bar{x}$             | $CI$ 95%             | $\bar{x}$             | $CI$ 95%              | $\bar{x}$             | $CI$ 95%             | $\bar{x}$                 | $CI$ 95%              |
| 2021 – 2020 | <b>23.8*</b>          | <b>[19.6, 28.0]</b> | <b>22.2*</b>          | <b>[19.0, 25.4]</b>  | <b>20.7*</b>          | <b>[16.6, 24.9]</b>   | <b>22.1*</b>          | <b>[17.5, 26.8]</b>  | <b>8.6*</b>               | <b>[5.1, 12.1]</b>    |
| 2022 – 2021 | -4.1                  | [-8.7, 0.4]         | <b>-9.0*</b>          | <b>[-12.7, -5.2]</b> | <b>-18.1*</b>         | <b>[-22.5, -13.7]</b> | <b>-5.7*</b>          | <b>[-10.7, -0.7]</b> | <b>-4.8*</b>              | <b>[-8.0, -1.6]</b>   |
| 2023 – 2022 | -3.9                  | [-8.4, 0.6]         | <b>-8.8*</b>          | <b>[-12.1, -5.4]</b> | -1.9                  | [-5.8, 2.0]           | <b>-7.9*</b>          | <b>[-12.4, -3.4]</b> | <b>-34.5*</b>             | <b>[-40.5, -28.4]</b> |

\* Statistical significance at 95% level. <sup>a</sup> Games-Howell test. <sup>b</sup> Two-sample Proportion z-test with Bonferroni correction per variable. TV\_A (videos of theoretical classes), AV\_A (animated complementary videos), PV\_A (recorded practical worked examples), RM\_A (recommended reading material), EF\_A (electronic forum).

Table S6. Spearman's rank correlation coefficient between the access (\_A) and declared use frequency (\_U) of the available resources in 2022.

| Resource | Correlation coefficient (_A vs. _U) |
|----------|-------------------------------------|
| TV       | 0.49*                               |
| AV       | 0.25*                               |
| PV       | 0.45*                               |
| RM       | 0.40*                               |
| EF       | 0.10                                |

\* Statistical significance at 95% level.

Table S7. Spearman's rank correlation coefficient between the declared use frequency ( $\_U$ ) and perceived usefulness ( $\_Uf$ ) of the available resources in 2022.

| Resource | Correlation coefficient ( $\_U$ vs. $\_Uf$ ) |
|----------|----------------------------------------------|
| TV       | 0.60*                                        |
| AV       | 0.73*                                        |
| PV       | 0.74*                                        |
| RM       | 0.71*                                        |
| TS       | 0.56*                                        |
| EF       | 0.60*                                        |
| M        | 0.47*                                        |

\* Statistical significance at 95% level.



Table S8. Temporal variation of the declared use and usefulness of the interactive materials' resources ( $\tau$ ).<sup>a</sup>

| Comparison  | CL_Uf        | FK_Uf         | KW_Uf         | KM_Uf         | Hy_Uf         |
|-------------|--------------|---------------|---------------|---------------|---------------|
| 2020 – 2017 | <b>0.12*</b> | <b>0.17*</b>  | -0.04         | <b>0.17*</b>  | 0.05          |
| 2022 – 2020 | -0.07        | <b>-0.18*</b> | <b>-0.26*</b> | <b>-0.35*</b> | <b>-0.29*</b> |
| 2022 – 2017 | 0.04         | -0.03         | <b>-0.29*</b> | <b>-0.21*</b> | <b>-0.24*</b> |

<sup>a</sup>  $\tau$  = Kendall's tau-b. \* Statistical significance at 95% level of confidence (Bonferroni correction per variable).

Table S9. Multiple linear regression analysis ( $y = \text{GCI}$ , average in marks %) on samples containing students grouped by previous academic performance (G1 thirds) or repeater students.

|                        | Highest G1 third                           | Medium G1 third | Lowest G1 third    | Repeater students |
|------------------------|--------------------------------------------|-----------------|--------------------|-------------------|
| Number of students     | 36                                         | 151             | 195                | 95                |
| Explained variance     | 83%                                        | 59%             | 59%                | 89%               |
| <i>Variables</i>       | <i>Regression coefficients<sup>a</sup></i> |                 |                    |                   |
| Gender (GDR)           | ---                                        | ---             | -1.66              | -1.60             |
| Online coursing (ON)   | <b>7.80**</b>                              | ---             | -3.08              | 3.26              |
| Course repetition (RP) | 4.71                                       | ---             | ---                | ---               |
| First test mark (G1)   | <b>1.01***</b>                             | <b>1.02***</b>  | <b>0.84***</b>     | <b>0.87***</b>    |
| Course drop-out (DR)   | ---                                        | <b>-17.3*</b>   | <b>-8.65***</b>    | <b>-12.7***</b>   |
| TV_U                   | ---                                        | ---             | 0.75               | ---               |
| AV_U                   | -1.30                                      | ---             | ---                | 1.34              |
| PV_U                   | ---                                        | -0.66           | ---                | <b>-2.03*</b>     |
| RM_U                   | ---                                        | ---             | ---                | <b>1.83*</b>      |
| TS_U                   | ---                                        | <b>1.53*</b>    | ---                | <b>2.20**</b>     |
| EF_U                   | -1.01                                      | <b>-2.16**</b>  | -0.72              | <b>-1.95*</b>     |
| M_U                    | <b>12.5*</b>                               | ---             | -3.29 <sup>†</sup> | -2.60             |
| FK_Uf                  | <b>2.60**</b>                              | ---             | ---                | ---               |
| KW_Uf                  | ---                                        | ---             | ---                | <b>3.78**</b>     |
| KM_Uf                  | ---                                        | ---             | ---                | 2.11              |
| Hy_Uf                  | ---                                        | ---             | ---                | <b>-5.62***</b>   |

<sup>a</sup> Statistical significance:  $p < 0.001$  (\*\*\*),  $p < 0.01$  (\*\*),  $p < 0.05$  (\*),  $p < 0.1$  (†).

## Supplementary figures

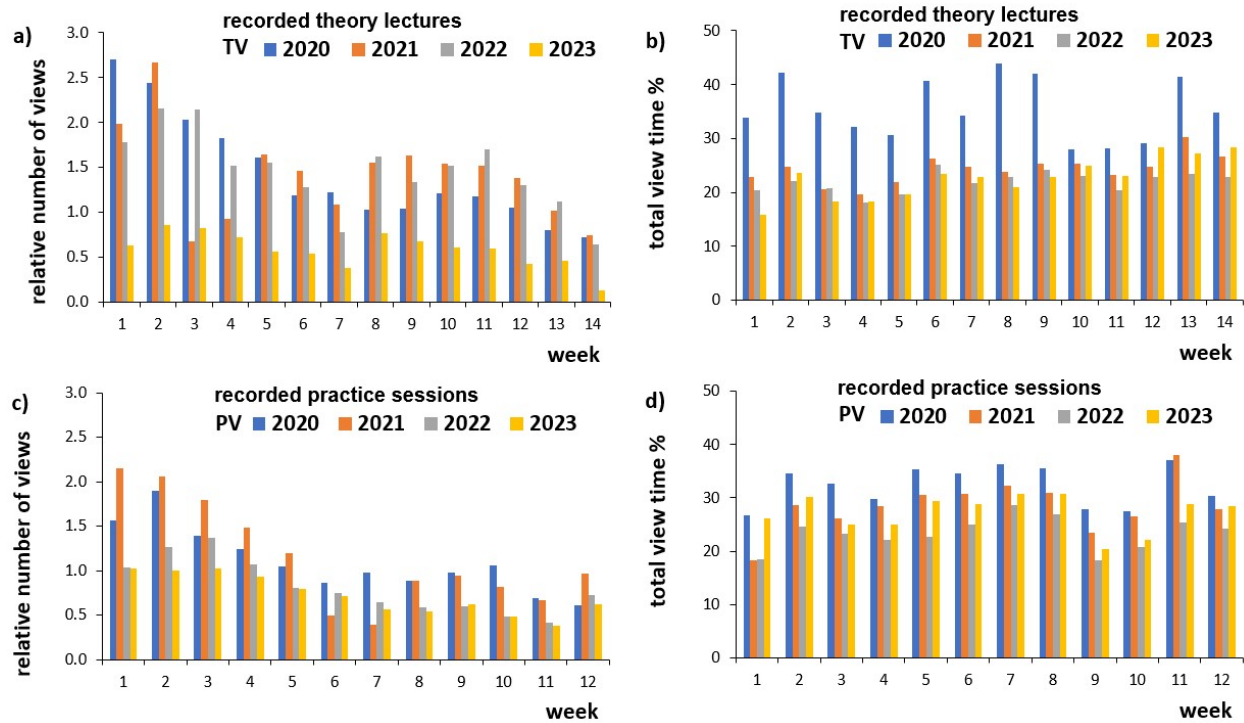

Figure S1. Temporal evolution of the relative number of views—proportion of the total number of views relative to enrolled students—(a, c) and the total view time %—average percentage of the video's total duration watched by viewers —(b, d) for the videos of theory lectures (TV) (a, b) and practice sessions (PV) (c, d).

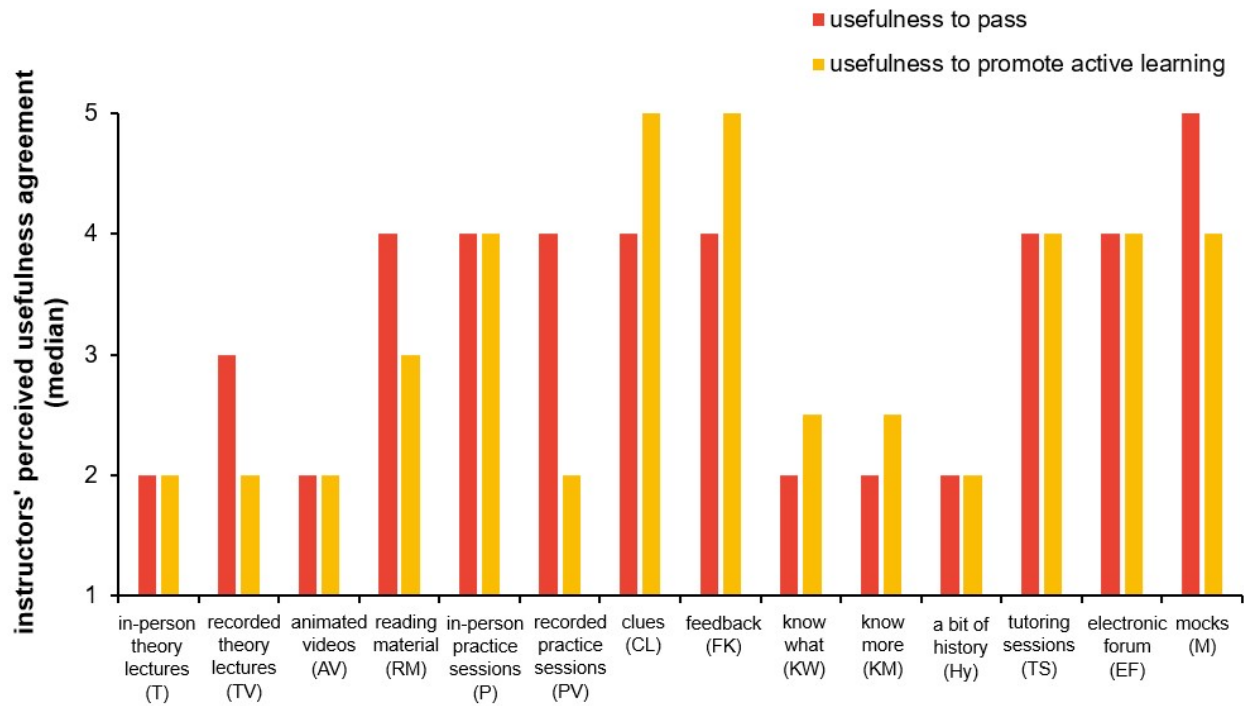

Figure S2. Instructors' survey results: median values obtained for the degree of agreement with regard to the usefulness to pass tests or to promote active learning (5: I totally agree, 4: I agree, 3: I neither agree nor disagree, 2: I disagree, and 1: I totally disagree).

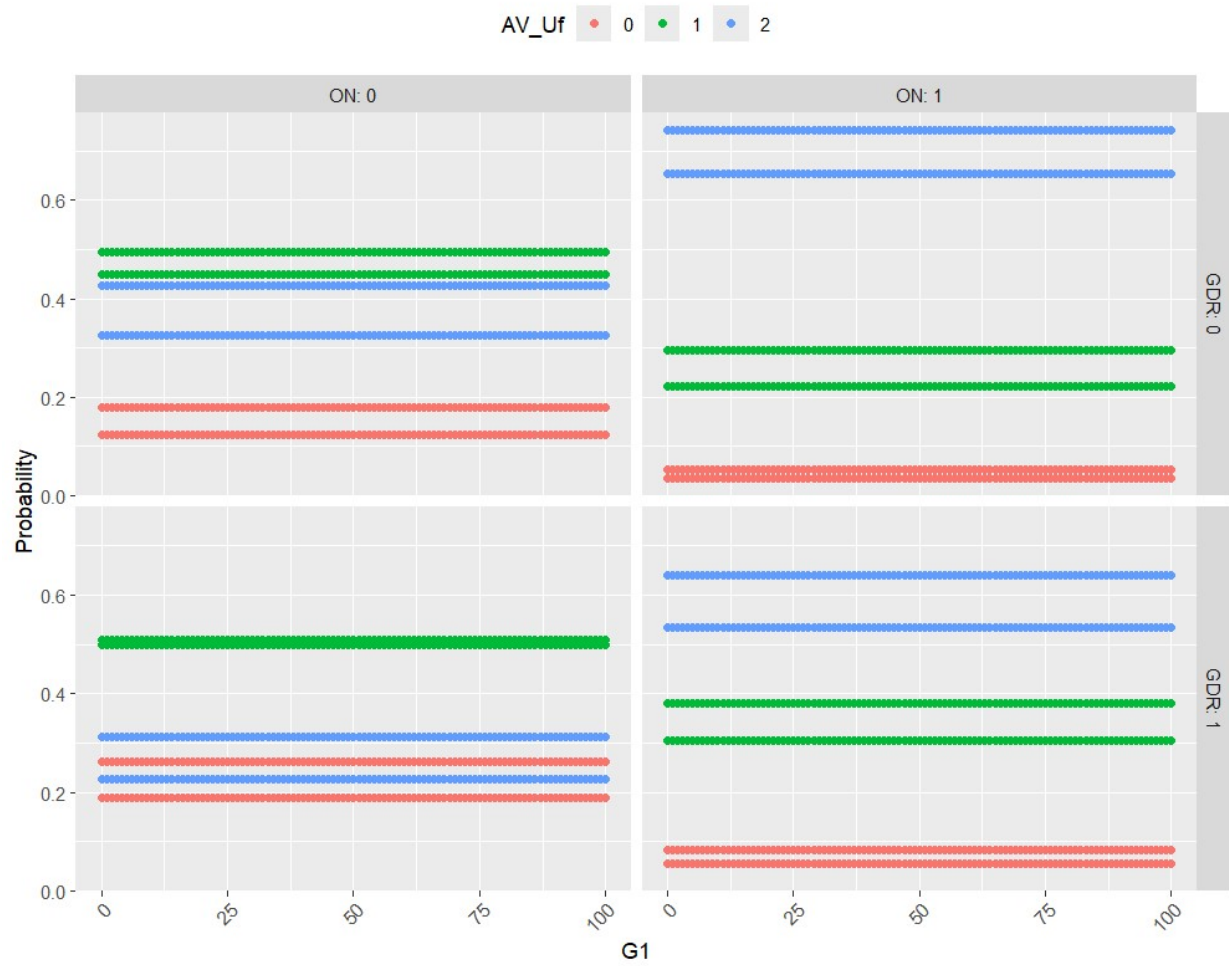

Figure S3. Probability of perceiving the complementary animated videos, AV, useful as a function of previous academic performance (G1), gender (GDR) and online coursing (ON).

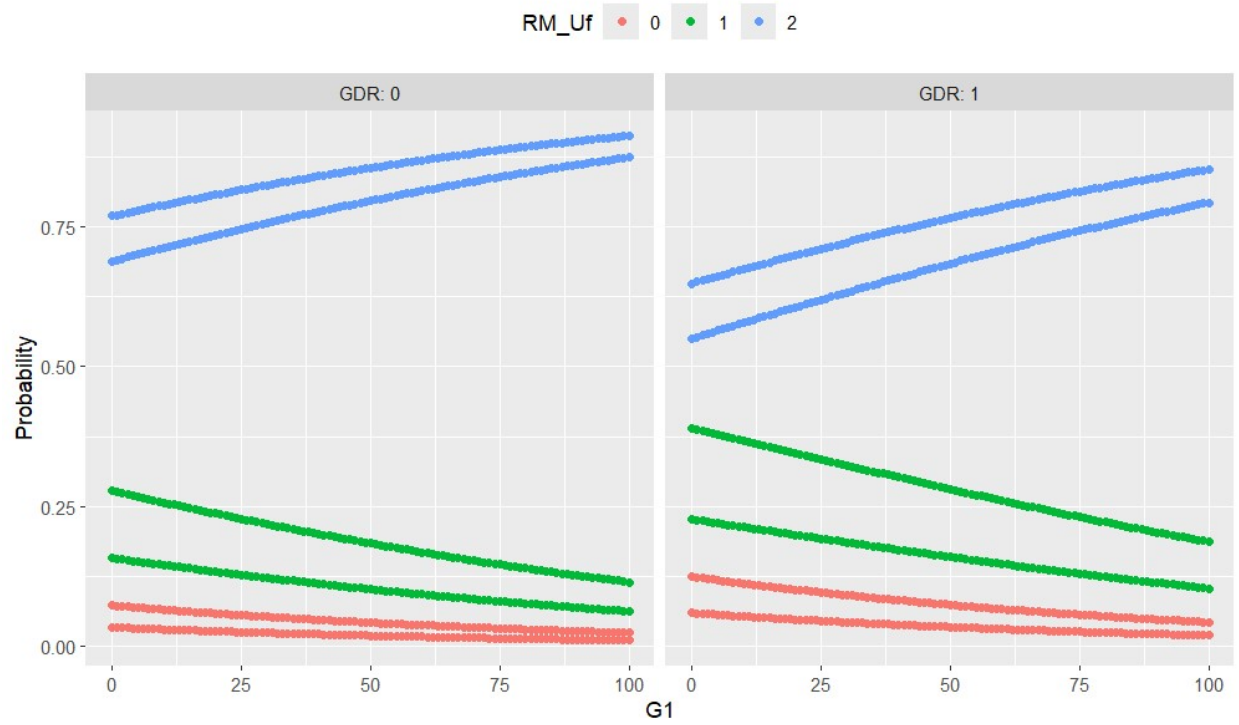

Figure S4. Probability of perceiving the recommended reading material, RM, useful as a function of previous academic performance (G1) and gender (GDR).

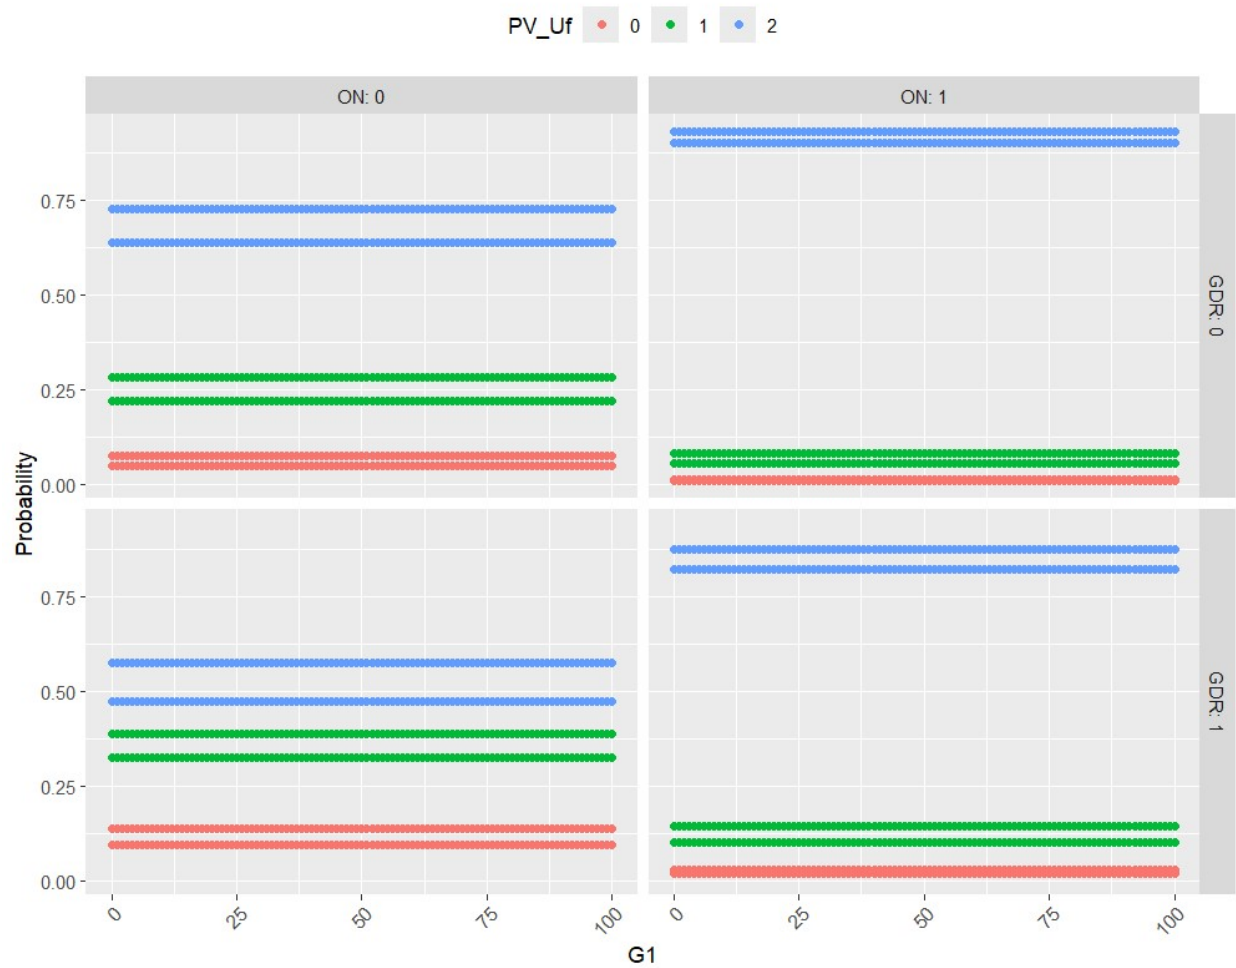

Figure S5. Probability of perceiving the recorded practical classes, PV, useful as a function of previous academic performance (G1), gender (GDR) and online coursing (ON).

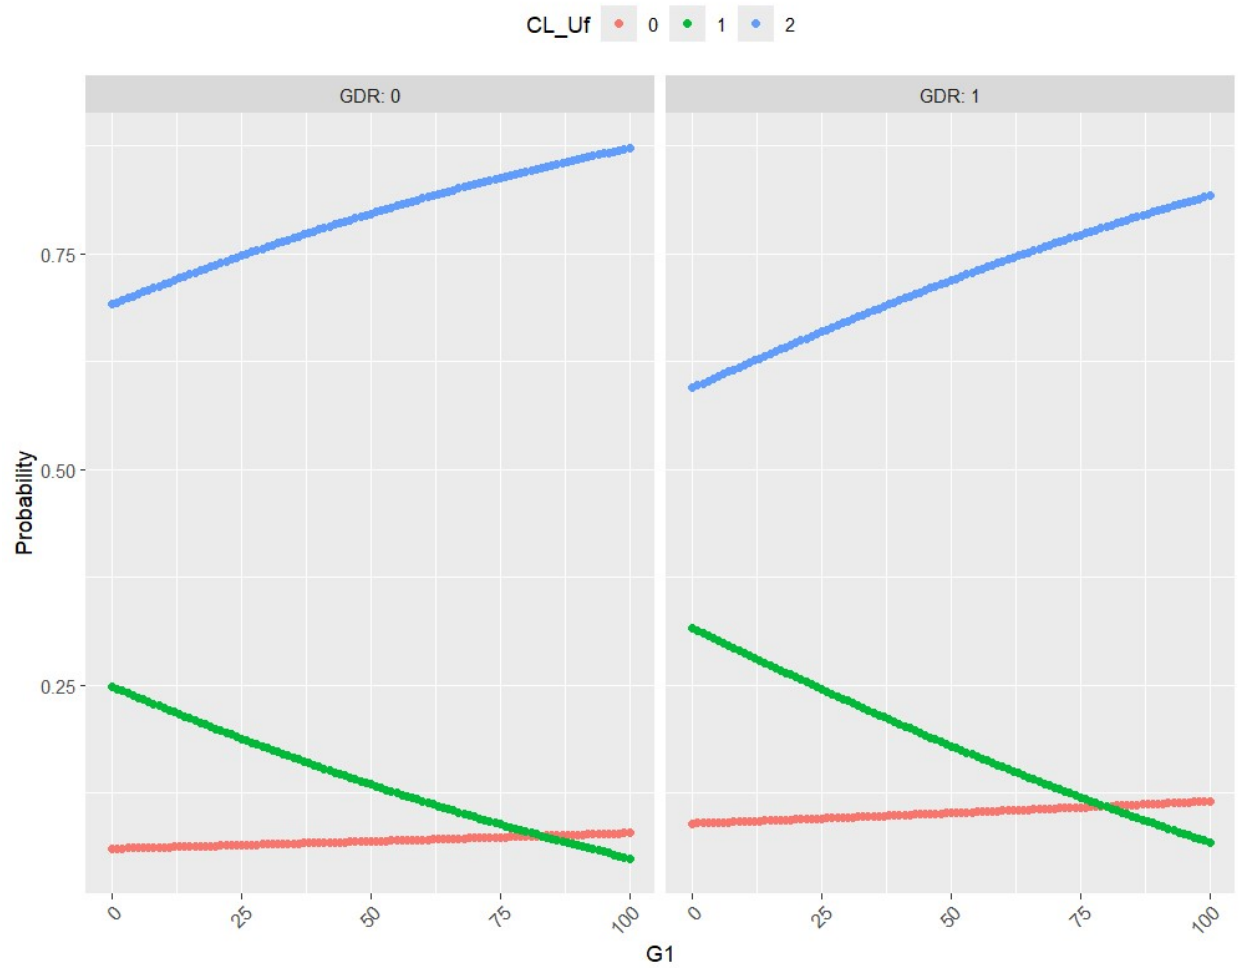

Figure S6. Probability of perceiving the solving clues, CL, useful as a function of previous academic performance (G1) and gender (GDR).



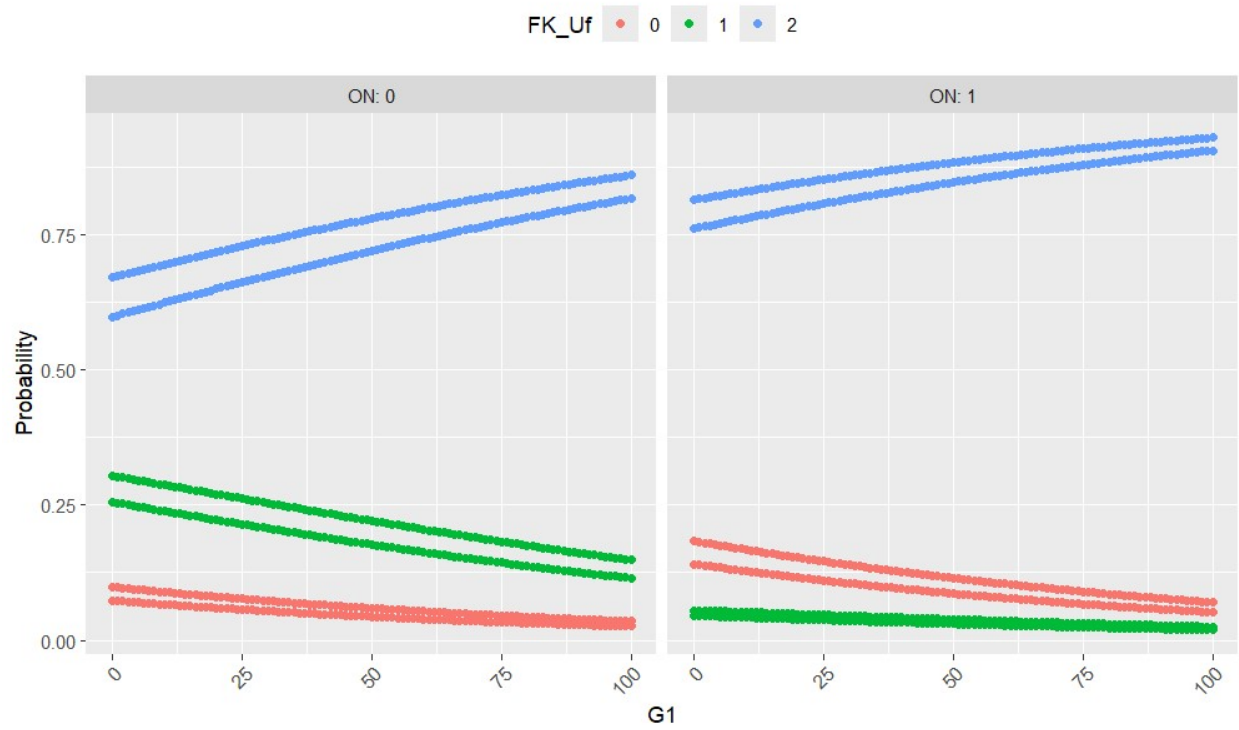

Figure S7. Probability of perceiving the feedback answers, FB, useful as a function of previous academic performance (G1) and online coursing (ON).

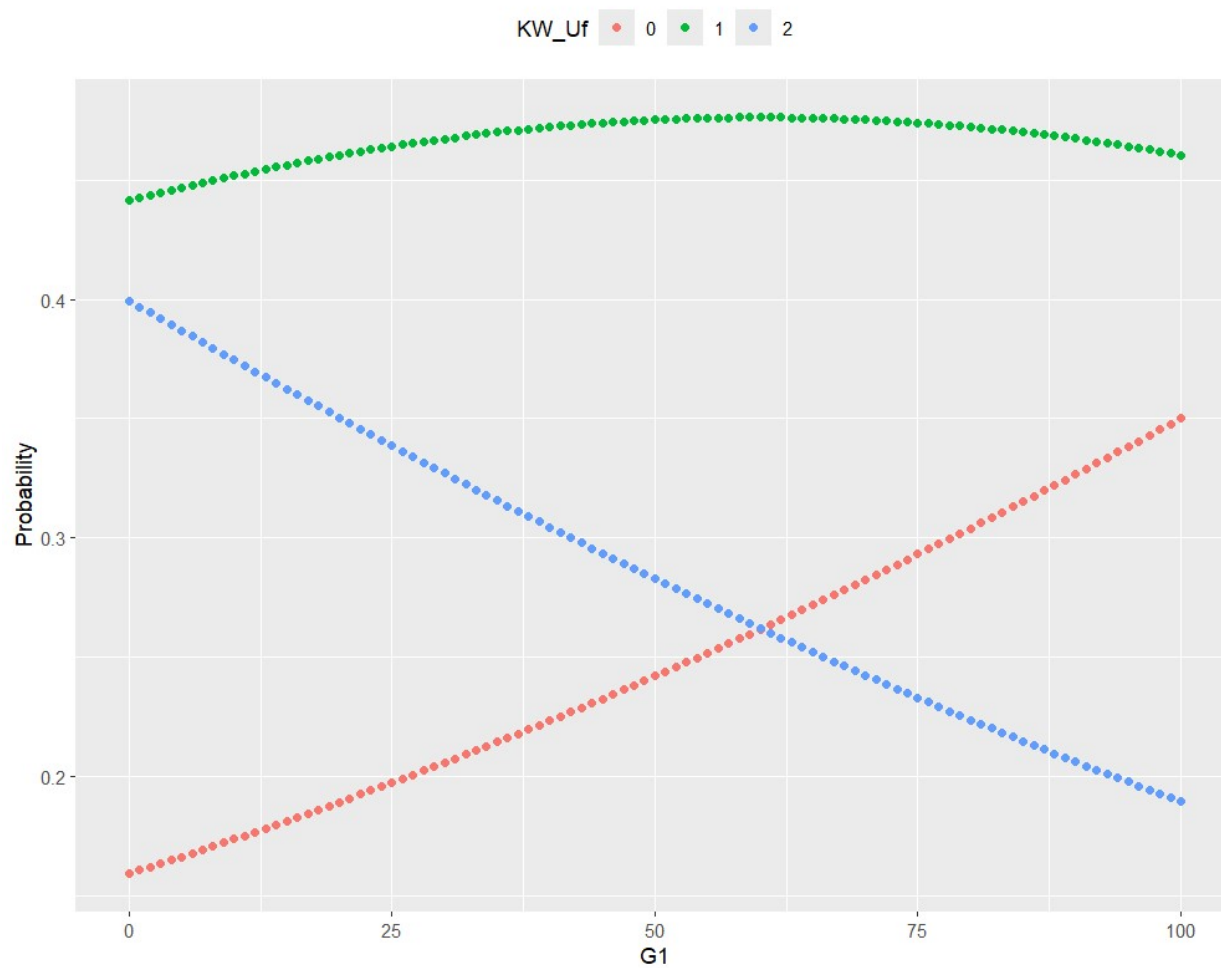

Figure S8. Probability of perceiving the "know-what" sections, KW, useful as a function of previous academic performance (G1).

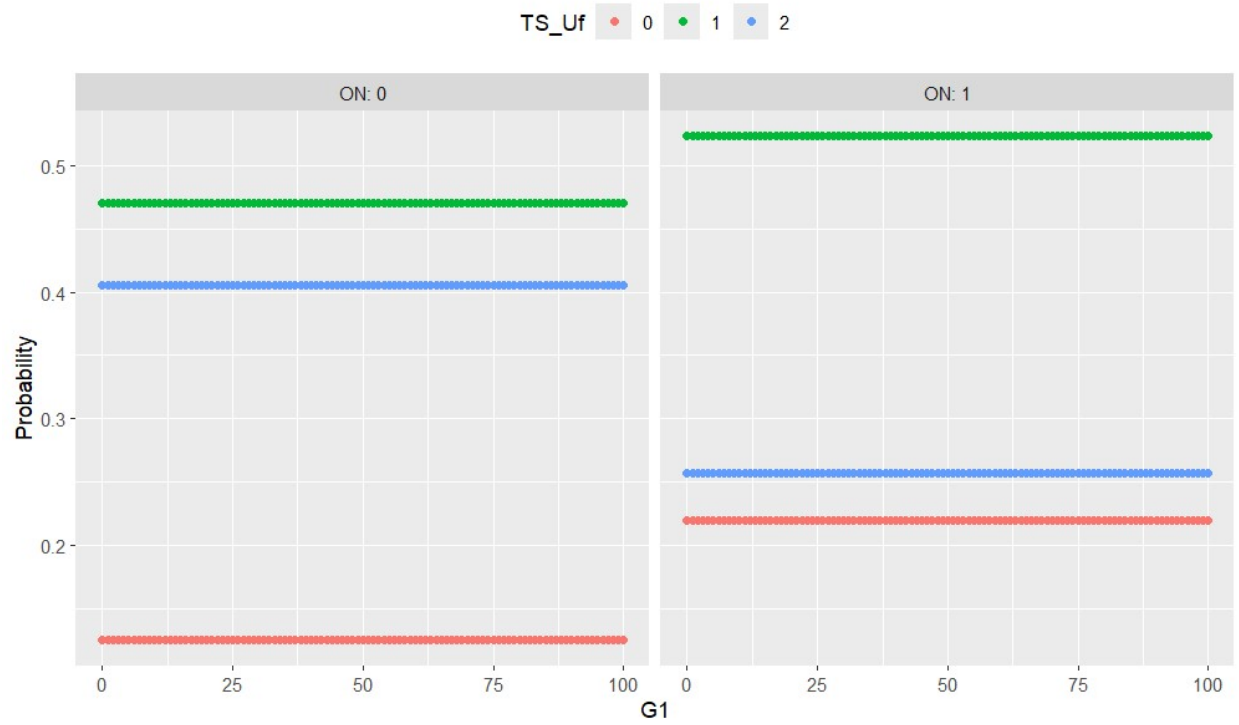

Figure S9. Probability of perceiving the tutoring sessions, TS, useful as a function of previous academic performance (G1) online coursing (ON).

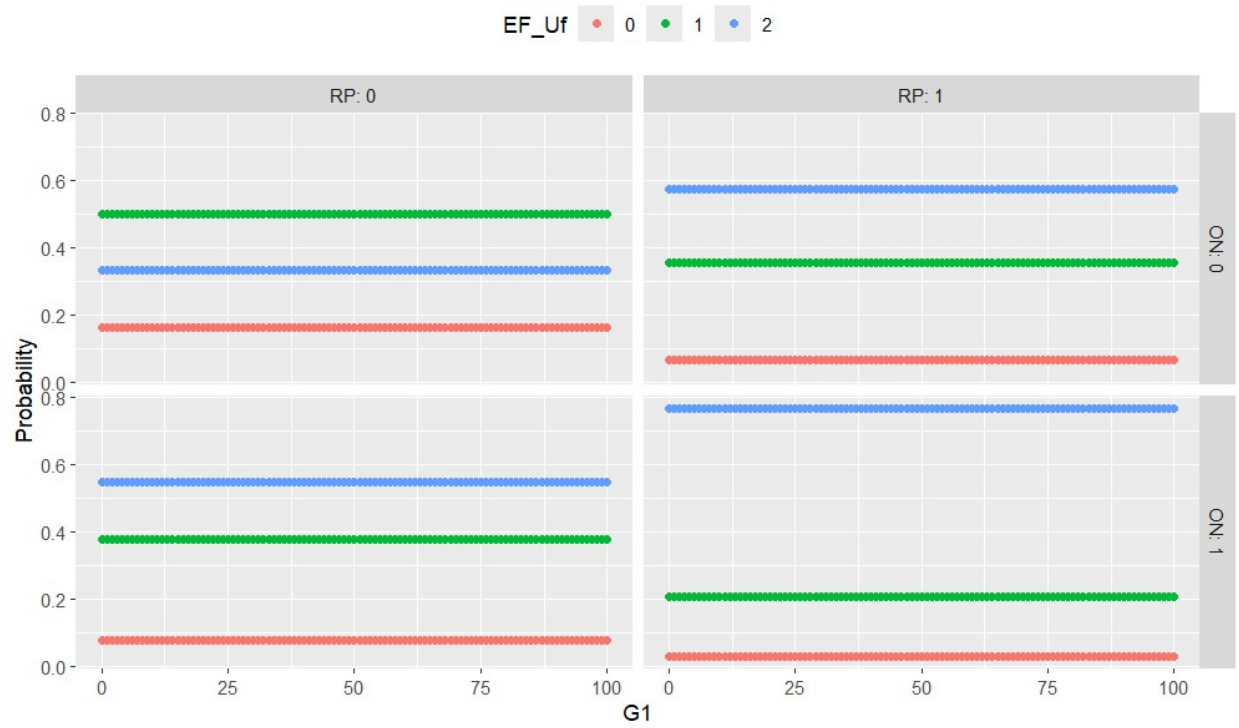

Figure S10. Probability of perceiving the electronic forum, EF, useful as a function of previous academic performance (G1), course repetition (RP) and online coursing (ON).

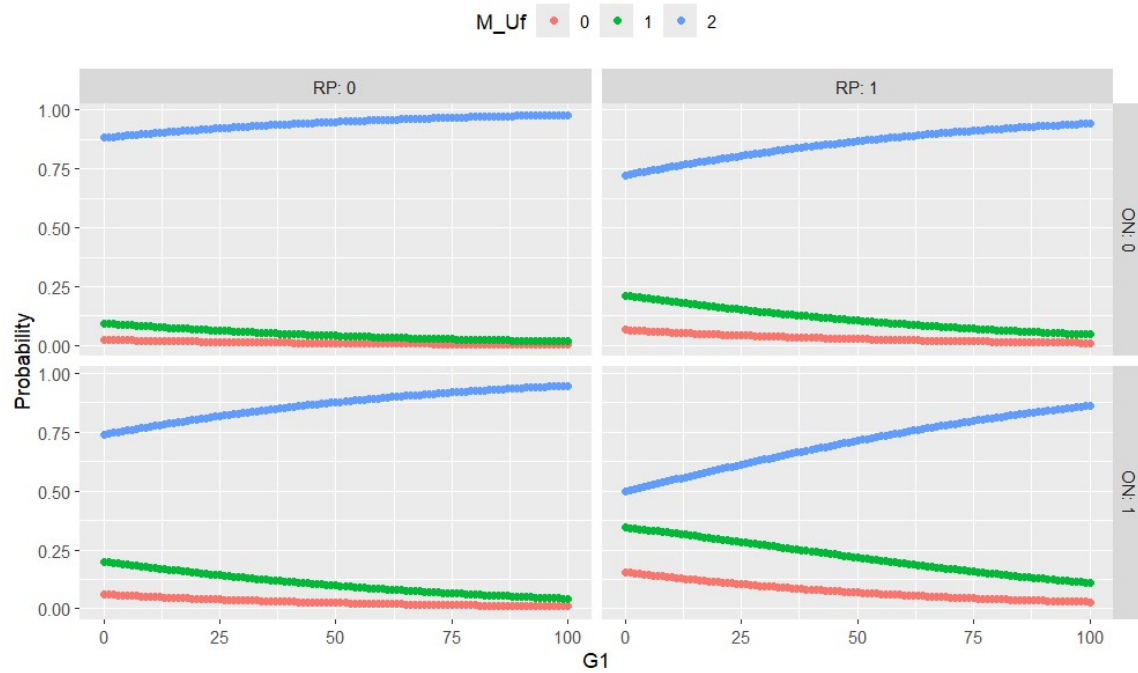

Figure S11. Probability of perceiving the mocks useful as a function of previous academic performance (G1), course repetition (RP) and online coursing (ON).

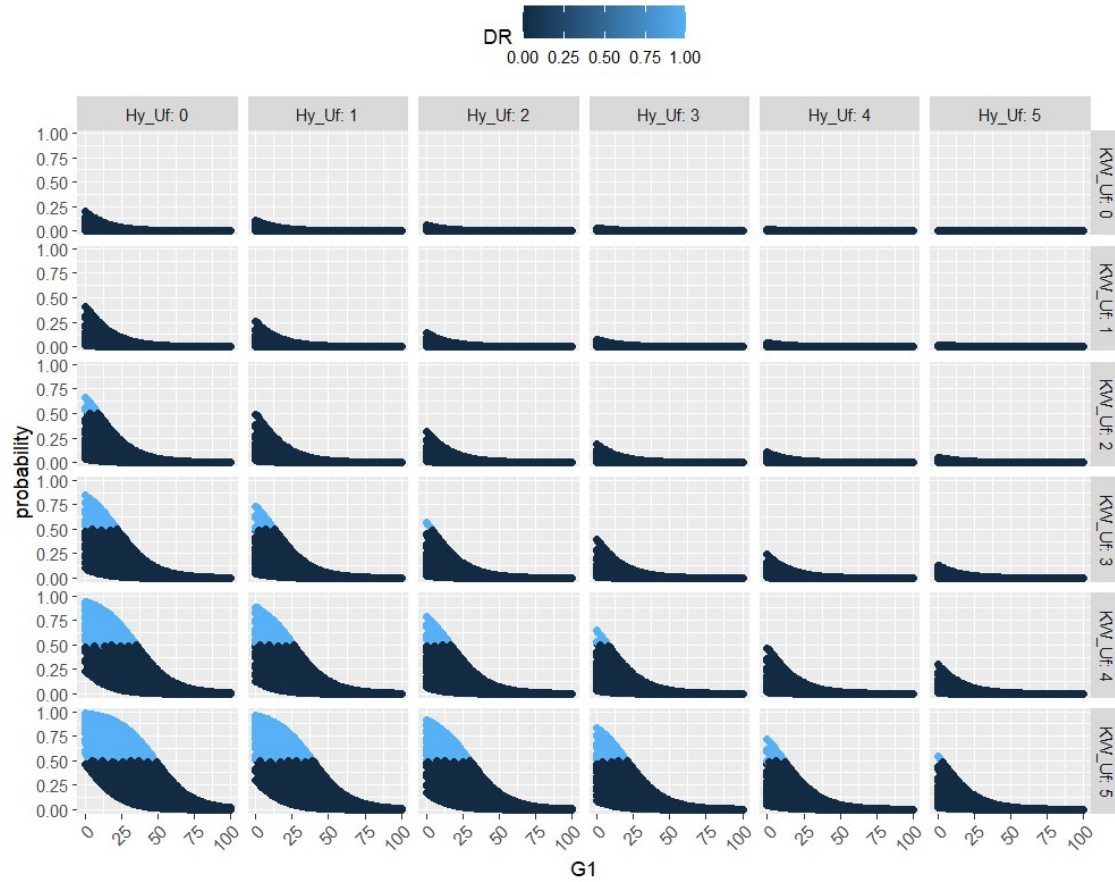

Figure S12. Probability of disengagement that leads to dropping out as a function of initial academic performance, G1, and the perceived usefulness of “know-what”, KW\_Uf, and “a bit of History” (Hy\_Uf) sections of the interactive materials.

## Supplementary sections

### Section SS1. Detailed statistical discussion on students' general descriptors: the impact of the pandemic

Table S2 presents the general descriptors for students, along with their temporal evolution during the pre-pandemic, pandemic, and post-pandemic periods. Of the 4511 students included in the study, 32% identified themselves as male and 68% as female. The general dropout rate during the semester (DR) reached 19%. The overall repetition rate (RP) is 23.5%, with most of the repeater students having dropped out during the previous edition of the course. Additionally, 7.9% of students opted for the distance learning option (ON). Regarding general performance in chemistry, the overall average final grade was 29.1% (minimum grade to pass the course is 51%).

To assess the temporal evolution of these descriptors across pre-pandemic (2017–2019), early pandemic (2020), late pandemic (2021), and post-pandemic (2022–2023) periods (Table S3), statistical comparisons were performed using two-sample z-tests for binary outcomes and the Games-Howell test for the continuous outcome (GCI). Gender distribution remained stable across all periods. Pearson's chi-square test showed no significant association between gender and period:  $\chi^2(1) = 0.51$ ,  $p = 0.474$ , Cramer's  $V = 0.015$  (pre vs. early pandemic),  $\chi^2(1) = 0.10$ ,  $p = 0.751$ ,  $V = 0.008$  (early pandemic vs. late pandemic),  $\chi^2(1) = 0.01$ ,  $p = 0.916$ ,  $V = 0.002$  (late pandemic vs. post), and  $\chi^2(1) = 1.44$ ,  $p = 0.230$ ,  $V = 0.022$  (pre vs. post).

In contrast, the proportion of repeater students significantly increased during the early pandemic. Comparing pre-pandemic to 2020, the proportion of repeaters rose by 6.1% (95% CI [1.6, 10.7]);  $\chi^2(1, N = 2,413) = 11.24$ ,  $p = 0.001$ ,  $V = 0.068$ . This rise persisted into the post-pandemic period, since there is an increase of 5.5% from pre- to post-pandemic (95% CI [1.8, 9.3];  $\chi^2(1, N = 3,054) = 13.43$ ,  $p < 0.001$ ,  $V = 0.066$ ). However, there were no significant differences between early and late pandemic ( $\chi^2(1) = 0.01$ ,  $p = 0.927$ ,  $V = 0.002$ ) or late pandemic and post-pandemic ( $\chi^2(1) = 0.16$ ,  $p = 0.687$ ,  $V = 0.009$ ).

On the other hand, there was an average increase of 4.9% in enrollment in the online modality during 2020 (95% CI [2.1, 7.7];  $\chi^2(1, N = 2,413) = 18.59$ ,  $p < 0.001$ ,  $V = 0.088$ ). Interestingly, despite a statistically significant 3.7% reduction in online enrollment from 2020 to 2021 (95% CI [-7.3, 0.0];  $\chi^2(1, N = 1,457) = 6.29$ ,  $p = 0.012$ ,  $V = 0.066$ ), the increased preference for this modality remained nearly intact after returning to in-person practice sessions. In fact, in the post-pandemic period, online enrollment stabilized at 4.7% above pre-pandemic levels (95% CI [2.3, 7.1];  $\chi^2(1, N = 3,054) = 23.47$ ,  $p < 0.001$ ,  $V = 0.088$ ).

The impact of the pandemic on dropout rates was immediate and strong. Between pre-pandemic and 2020, dropout increased by 19.8% (95% CI [15.4, 24.3];  $\chi^2(1) = 123.31$ ,  $p < 0.001$ ,  $V = 0.226$ ), indicating a medium-to-large effect size. This phenomenon occurred in conjunction with a 9.1% drop in their academic performance (95% CI [-11.8, -6.4]; Games-Howell  $q(1268) = -12.20$ ,  $p < 0.001$ ). Besides, from 2020 to 2021, dropout decreased significantly by 14.0% (95% CI [-19.8, -8.1];  $\chi^2(1) = 35.97$ ,  $p < 0.001$ ,  $V = 0.157$ ), and a 7.5% increase in final course marks (95% CI [4.3, 10.6];  $q(1439) = 8.64$ ,  $p < 0.001$ ). Besides, comparing pre- and post-pandemic periods, dropout rates did not differ significantly ( $\chi^2(1) = 2.15$ ,  $p = 0.143$ ,  $V = 0.027$ ). Regarding average final marks, GCI, even though there is a drop of 3.6% from 2017–2019 to 2022/2023 (95% CI [-5.8, -1.6];  $q(2920) = -6.32$ ,  $p < 0.001$ ), the variation between 2019 and 2022/2023 is not statistically significant (-0.7%; 95% CI [-2.9, +1.5];  $q(1071) = -0.86$ ,  $p = 0.544$ ). As a result, dropout rates and academic performance appear to have returned to levels comparable to those seen just before the pandemic.

## Section SS2. Detailed statistical discussion on students' access to digital resources and their evolution across the pandemic

Data on the relative number of views and the total view time of recorded theory lectures (TV) and practice session videos (PV) from 2020 to 2023 were analyzed using two-factor ANOVAs (factors: year and week).

For **TV views**, results revealed a significant effect of week,  $F(13, 39) = 5.01$ ,  $p = 4.3 \times 10^{-5}$ , partial  $\eta^2 = 0.63$ , and a significant effect of year,  $F(3, 39) = 23.43$ ,  $p = 7.7 \times 10^{-9}$ , partial  $\eta^2 = 0.64$ . Indeed, the number of views decreased over the weeks of the course (Figures S1a and c), with an overall reduction of about 121% relative to enrollment across 2020–2023. Moreover, data from 2023 show a smaller number of views for theory lectures of about 83 - 87% of the course enrollment compared to the 2020–2022 period. In detail, post-hoc Tukey HSD tests for the Year factor showed that views in 2023 ( $M = 0.59$ ) were significantly lower than in 2020 ( $M = 1.43$ ,  $p < 0.001$ , Cohen's  $d = 2.57$ ), 2021 ( $M = 1.42$ ,  $p < 0.001$ ,  $d = 2.53$ ), and 2022 ( $M = 1.46$ ,  $p < 0.001$ ,  $d = 2.66$ ). No significant differences were found between the years 2020, 2021, and 2022 (all  $p > 0.98$ ).

For **PV views**, there was also a significant effect of week,  $F(11, 33) = 11.21$ ,  $p = 3.0 \times 10^{-8}$ , partial  $\eta^2 = 0.79$ , and year,  $F(3, 33) = 12.15$ ,  $p = 1.6 \times 10^{-5}$ , partial  $\eta^2 = 0.52$ . View numbers declined across weeks, with a reduction of 71% of the course enrollment for the whole sample 2020–2023. Besides, recorded practice sessions from 2022–2023 also have fewer views compared to the pandemic period, with a reduction between 29 and 43% of the enrollment. In detail, post-hoc Tukey HSD tests for the Year factor indicated that views in 2022 ( $M = 0.81$ ) and 2023 ( $M = 0.72$ ) were both significantly lower than in 2020 ( $M = 1.10$ ; 2022 vs. 2020:  $p = 0.010$ ,  $d = 1.37$ ; 2023 vs. 2020:  $p < 0.001$ ,  $d = 1.79$ ) and 2021 ( $M = 1.15$ ; 2022 vs. 2021:  $p = 0.002$ ,  $d = 1.63$ ; 2023 vs. 2021:  $p < 0.001$ ,  $d = 2.05$ ). Views in 2022 and 2023 did not differ significantly from each other ( $p = 0.73$ ).

For **TV view time**, there was a significant effect of week,  $F(13, 39) = 3.00$ ,  $p = 0.004$ , partial  $\eta^2 = 0.50$ , and year,  $F(3, 39) = 58.59$ ,  $p = 1.6 \times 10^{-14}$ , partial  $\eta^2 = 0.82$ . View times were higher in 2020 compared to 2021–2023, with differences corresponding to 11.1% to 13.5% of the video duration. Post-hoc Tukey HSD tests for the Year factor revealed that view time was significantly longer in 2020 ( $M = 35.44\%$ ) compared to 2021 ( $M = 24.34\%$ ,  $p < 0.001$ ,  $d = 3.60$ ), 2022 ( $M = 21.96\%$ ,  $p < 0.001$ ,  $d = 4.38$ ), and 2023 ( $M = 22.70\%$ ,  $p < 0.001$ ,  $d = 4.14$ ). There were no significant differences in view time among the years 2021, 2022, and 2023 (all  $p > 0.18$ ).

For **PV view time**, a significant effect of week emerged,  $F(11, 33) = 12.68$ ,  $p = 6.6 \times 10^{-9}$ , partial  $\eta^2 = 0.81$ , as well as a significant effect of year,  $F(3, 33) = 43.75$ ,  $p = 1.3 \times 10^{-11}$ , partial  $\eta^2 = 0.80$ . View times were highest in 2020, with engagement between 4–9% longer than in subsequent years. In detail, post-hoc Tukey HSD tests for the Year factor showed that view time in 2020 ( $M = 32.33\%$ ) was significantly higher than in all subsequent years (2021:  $M = 28.49\%$ ,  $p < 0.001$ ,  $d = 1.98$ ; 2022:  $M = 23.35\%$ ,  $p < 0.001$ ,  $d = 4.63$ ; 2023:  $M = 27.15\%$ ,  $p < 0.001$ ,  $d = 2.67$ ). Furthermore, view time in 2022 was significantly lower than in 2023 ( $p < 0.001$ ,  $d = 1.96$ ). No other comparisons were significant.



### Section SS3. Statistical detailed discussion on survival analysis to analyze dropout

For each student enrolled in the 2022 in-person course (571 students), the number of weeks they attended in-person practice sessions was collected. Disengagement point was defined as the week in which a student stopped attending practice sessions consecutively until the final week of classes (week 12; see the statistical analysis section for further details). It can be observed that disengagement probability increases notably during the second half of the course (Figure 5a; week 6 onwards). In general, assuming the sample is representative of the population, it is predicted that 9.7% of students drop out in the second half of the course (95% CI [-11.0, -8.4]), compared to a three times lower dropout rate in the first half (3.1%; 95% CI [1.7, 4.5]).

A Cox Proportional Hazards Model was applied to the data to identify statistically significant dropout determinants influencing the risk of dropout. The results are summarized in Table 3. The model's concordance index is 76%, indicating good predictive power in distinguishing between students who drop out and those who remain enrolled. Consistent with the logistic regression findings, higher test scores are associated with a lower probability of dropping out. Specifically, for each additional point in the first test, G1, the hazard of dropping out decreases by approximately 6% ( $p = 7 \times 10^{-8}$ ). Interestingly, repeaters are 72% more likely to drop out than freshman students when all other variables are held constant ( $p = 0.02$ ). The disparity in dropout rates between repeater and freshman students becomes more pronounced in the second half of the semester.
